# Supplementary material for: scPADGRN: A preconditioned ADMM approach for reconstructing dynamic gene regulatory network using single-cell RNA sequencing data
Source: PubMed Central journal article supplement (PMC7410337; doi:10.1371/journal.pcbi.1007471), 2020-07-27
Supplement: pcbi.1007471.s003.pdf [file pcbi.1007471.s003.pdf]

### S3 Text: R package scPADGRN

We provide R package scPADGRN at github: <https://github.com/xzheng-ac/scPADGRN>. Specific script and examples also available through the link above.

This repository contains R codes to implement scPADGRN and three demo datasets with their pre-processing scripts in the directory of \scPADGRN\data.
