# Supplementary material for: scPADGRN: A preconditioned ADMM approach for reconstructing dynamic gene regulatory network using single-cell RNA sequencing data
Source: PubMed Central journal article supplement (PMC7410337; doi:10.1371/journal.pcbi.1007471), 2020-07-27
Supplement: pcbi.1007471.s014.pdf [file pcbi.1007471.s014.pdf]

S2 Table: Full simulation results for Table 2

| gene=200, cluster=40,80,120,160,200, cell=10*gene, relative error=0.01 |                |        |         |                   |            |                      |        |        |        |       |       |       |       |
|------------------------------------------------------------------------|----------------|--------|---------|-------------------|------------|----------------------|--------|--------|--------|-------|-------|-------|-------|
| Gene number                                                            | Cluster number | Method | Time(s) | PADMM cut time by | #iteration | Reconstruction error |        |        |        | AUC   |       |       |       |
|                                                                        |                |        |         |                   |            | t1                   | t2     | t3     | t4     | t1    | t2    | t3    | t4    |
| 200                                                                    | 200            | ADMM   | 8.921   | 56.44%            | 25         | 1.533                | 1.828  | 2.996  | 4.172  | 1.000 | 1.000 | 1.000 | 1.000 |
|                                                                        |                | PADMM  | 3.886   |                   | 33         | 1.533                | 1.828  | 2.996  | 4.171  | 1.000 | 1.000 | 1.000 | 1.000 |
|                                                                        | 160            | ADMM   | 5.819   | 61.57%            | 17         | 8.990                | 8.627  | 8.852  | 9.023  | 1.000 | 1.000 | 1.000 | 1.000 |
|                                                                        |                | PADMM  | 2.236   |                   | 18         | 8.990                | 8.627  | 8.852  | 9.023  | 1.000 | 1.000 | 1.000 | 1.000 |
|                                                                        | 120            | ADMM   | 5.080   | 74.97%            | 17         | 12.748               | 12.541 | 12.573 | 12.523 | 1.000 | 1.000 | 1.000 | 1.000 |
|                                                                        |                | PADMM  | 1.272   |                   | 12         | 12.749               | 12.542 | 12.573 | 12.523 | 1.000 | 1.000 | 1.000 | 1.000 |
|                                                                        | 80             | ADMM   | 5.317   | 72.24%            | 17         | 15.460               | 15.614 | 15.329 | 15.408 | 0.995 | 0.998 | 0.997 | 0.999 |
|                                                                        |                | PADMM  | 1.476   |                   | 10         | 15.460               | 15.614 | 15.329 | 15.408 | 0.995 | 0.998 | 0.997 | 0.999 |
|                                                                        | 40             | ADMM   | 4.982   | 69.71%            | 17         | 17.658               | 17.777 | 17.812 | 17.784 | 0.970 | 0.979 | 0.984 | 0.984 |
|                                                                        |                | PADMM  | 1.509   |                   | 10         | 17.658               | 17.777 | 17.812 | 17.784 | 0.970 | 0.979 | 0.984 | 0.984 |
| gene=400, cluster=40*(1:10) cell=10*gene, relative error=0.01          |                |        |         |                   |            |                      |        |        |        |       |       |       |       |
| Gene number                                                            | Cluster number | Method | Time(s) | PADMM cut time by | #iteration | Reconstruction error |        |        |        | AUC   |       |       |       |
|                                                                        |                |        |         |                   |            | t1                   | t2     | t3     | t4     | t1    | t2    | t3    | t4    |
| 400                                                                    | 400            | ADMM   | 80.597  | 74.10%            | 37         | 3.296                | 4.398  | 6.349  | 8.207  | 0.998 | 1.000 | 1.000 | 1.000 |
|                                                                        |                | PADMM  | 20.873  |                   | 32         | 3.296                | 4.398  | 6.349  | 8.207  | 0.998 | 1.000 | 1.000 | 1.000 |
|                                                                        | 360            | ADMM   | 39.954  | 60.40%            | 19         | 12.541               | 12.559 | 12.576 | 12.592 | 0.998 | 1.000 | 1.000 | 1.000 |
|                                                                        |                | PADMM  | 15.820  |                   | 24         | 12.541               | 12.559 | 12.575 | 12.591 | 0.998 | 1.000 | 1.000 | 1.000 |
|                                                                        | 320            | ADMM   | 33.953  | 72.98%            | 17         | 17.902               | 17.760 | 17.815 | 17.486 | 0.996 | 1.000 | 1.000 | 1.000 |
|                                                                        |                | PADMM  | 9.173   |                   | 14         | 17.903               | 17.760 | 17.816 | 17.486 | 0.996 | 1.000 | 1.000 | 1.000 |
|                                                                        | 280            | ADMM   | 32.622  | 77.49%            | 17         | 21.863               | 21.709 | 21.786 | 22.056 | 0.995 | 1.000 | 1.000 | 1.000 |
|                                                                        |                | PADMM  | 7.342   |                   | 11         | 21.864               | 21.710 | 21.787 | 22.056 | 0.995 | 1.000 | 1.000 | 1.000 |
|                                                                        | 240            | ADMM   | 32.649  | 80.02%            | 17         | 25.405               | 25.317 | 25.246 | 25.231 | 0.992 | 1.000 | 1.000 | 1.000 |
|                                                                        |                | PADMM  | 6.525   |                   | 9          | 25.406               | 25.319 | 25.246 | 25.232 | 0.992 | 1.000 | 1.000 | 1.000 |
|                                                                        | 200            | ADMM   | 30.353  | 80.68%            | 17         | 28.151               | 28.170 | 28.234 | 28.193 | 0.993 | 1.000 | 1.000 | 1.000 |
|                                                                        |                | PADMM  | 5.865   |                   | 8          | 28.153               | 28.171 | 28.234 | 28.193 | 0.993 | 1.000 | 1.000 | 1.000 |
|                                                                        | 160            | ADMM   | 29.650  | 82.12%            | 17         | 30.804               | 30.853 | 30.709 | 30.901 | 0.991 | 0.999 | 0.999 | 0.999 |
|                                                                        |                | PADMM  | 5.303   |                   | 8          | 30.805               | 30.853 | 30.709 | 30.901 | 0.991 | 0.999 | 0.999 | 0.999 |
|                                                                        | 120            | ADMM   | 28.932  | 83.54%            | 17         | 33.323               | 33.241 | 33.268 | 33.307 | 0.987 | 0.997 | 0.997 | 0.997 |
|                                                                        |                | PADMM  | 4.762   |                   | 7          | 33.325               | 33.241 | 33.268 | 33.307 | 0.987 | 0.997 | 0.997 | 0.997 |
|                                                                        | 80             | ADMM   | 28.018  | 83.71%            | 17         | 35.725               | 35.632 | 35.626 | 35.577 | 0.973 | 0.991 | 0.989 | 0.991 |
|                                                                        |                | PADMM  | 4.565   |                   | 7          | 35.726               | 35.633 | 35.626 | 35.577 | 0.973 | 0.991 | 0.989 | 0.991 |
|                                                                        | 40             | ADMM   | 27.477  | 84.02%            | 17         | 37.809               | 37.791 | 37.725 | 37.894 | 0.926 | 0.957 | 0.964 | 0.949 |
|                                                                        |                | PADMM  | 4.392   |                   | 7          | 37.810               | 37.791 | 37.725 | 37.894 | 0.926 | 0.957 | 0.964 | 0.949 |
