# Supplementary material for: scPADGRN: A preconditioned ADMM approach for reconstructing dynamic gene regulatory network using single-cell RNA sequencing data
Source: PubMed Central journal article supplement (PMC7410337; doi:10.1371/journal.pcbi.1007471), 2020-07-27
Supplement: pcbi.1007471.s015.pdf [file pcbi.1007471.s015.pdf]

S3 Table: Gene lists in dataset 1-3

| Dataset1 |         |         |         |         |         |         |         |
|----------|---------|---------|---------|---------|---------|---------|---------|
| SOX2     | ZFP710  | PEG3    | RHOX6   | TCF15   | GLI1    | CARHSP1 | TCF7L2  |
| ESRRB    | MYCN    | ID2     | ID3     | ELF3    | FOXD3   | TGIF1   | ZFP532  |
| UTF1     | BCL3    | RBPJ    | ZFP428  | NANOG   | ETV4    | SIX1    | ZBTB44  |
| EPAS1    | GATA6   | KDM5B   | REST    | HMGA1   | MYBL2   | RARG    | ELF2    |
| FOXQ1    | HOPX    | EGR1    | PURB    | ETV5    | TEAD4   | ZBTB10  | ETS1    |
| KLF2     | ID1     | PARP1   | PHB     | CREB3L2 | NFIL3   | XBP1    | JUN     |
| GATA4    | HNF1B   | BHLHE40 | ZC3H7A  | FOXH1   | HMGA2   | ZFHX3   | BMYC    |
| SOX17    | L3MBTL3 | RUNX1   | ERF     | NFXL1   | GLI2    | DNMT3B  | POU4F2  |
| NR0B1    | KLF3    | FOXA2   | TET2    | SOX7    | MSX2    | RERE    | TFEB    |
| ZFP42    | DNMT3L  | SNAI1   | SATB2   | TAX1BP3 | WHSC1   | MSC     | DDIT3   |
| POU5F1   | SMAD7   | KLF6    | ZFP296  | TET1    | KLF4    | TRP53   | SALL4   |
| DNMT3A   | KLF10   | BMP2    | AFF1    | JARID2  | MTF2    | ZFP57   | ZFP462  |
| TFCP2L1  | TBX3    | CREB3   | HNRNP   |         |         |         |         |
| Dataset2 |         |         |         |         |         |         |         |
| HMGA2    | PHB2    | SMARCB1 | FOSL2   | NCOA1   | MEF2A   | TET2    | PCBP2   |
| ASCL1    | SCX     | PHB     | GATAD1  | ETS1    | CREB3   | EZH2    | MIER1   |
| FOS      | BOLA3   | JUN     | DNAJC2  | ZFP238  | NONO    | DDIT3   | KLF4    |
| ATF3     | ATF4    | AEBP1   | FOXS1   | PRRX1   | NOC4L   | HBP1    | RELA    |
| HMGA1    | ZBTB20  | PHF5A   | MEF2C   | LRRFIP1 | TAX1BP3 | MYC     | MKX     |
| ENO1     | CSDA    | PLAGL1  | KDM5B   | KLF6    | CENPT   | TCF19   | JUNB    |
| HES6     | TCF12   | NFKBIA  | NFE2L1  | EBF1    | MAF1    | NFIC    | NR2F2   |
| TRP53    | FOXP2   | SNAI2   | PCBP1   | FOSL1   | SP1     | SSRP1   | DNMT3A  |
| EGR1     | TCF4    | TSC22D3 | IRF9    | TFDP1   | STAT1   | ZMAT5   | RUNX1T1 |
| ZFP36L2  | MATR3   | TGIF1   | KHSRP   | ID2     | SFPQ    | SOX9    | KLF10   |
| SOX11    | FUBP1   | FOSB    | NFYB    | ZFP207  | ZFP317  | ZFP260  | ZEB2    |
| ZFP57    | TSC22D1 | RORC    | NFIA    | BOLA2   | NR1D1   | STAT6   | ZFHX4   |
| LYAR     | ATOH8   | MAF     | CREB3L1 |         |         |         |         |
| Dataset3 |         |         |         |         |         |         |         |
| GATA6    | SOX5    | NFE2L3  | ZNF471  | NFIB    | KLF10   | AEBP2   | SMAD7   |
| NANOG    | ZFP36L2 | ZEB1    | ARID4B  | SOX2    | ZIC5    | CDX1    | ZNF587  |
| T        | LEF1    | FOXF1   | SNAI2   | MSX1    | BBX     | TCF7L1  | SOX17   |
| EOMES    | BCL11A  | PITX2   | ZNF483  | KLF8    | RNF138  | MIER1   | ZFP62   |
| ID2      | HBP1    | HOXB3   | MAF     | GRHL2   | SATB1   | KLF6    | SRF     |
| PRDM1    | IRX3    | ID4     | ETV6    | ZNF521  | BAZ2B   | MYCN    | JUND    |
| ID1      | MEIS2   | ZNF165  | ZKSCAN1 | BHLHE40 | ELK3    | SMAD2   | TUB     |
| ZNF516   | ZFX     | TCF7L2  | ETV1    | TFAP2A  | ZBTB2   | PLAGL1  | ZFP14   |
| SHOX2    | TERF1   | POU5F1  | TMF1    | GATA3   | ETV5    | ZSCAN10 | ARID3A  |

|       |       |       |       |      |       |        |       |
|-------|-------|-------|-------|------|-------|--------|-------|
| TBX3  | TOX   | SP5   | HIF3A | ZEB2 | SP6   | ZNF652 | CEBPZ |
| GATA4 | FOXH1 | ZIC3  | SALL2 | BNC2 | ZFP42 | HOXB6  | E2F4  |
| OTX2  | HESX1 | TRPS1 | SHOX  | KAT7 | TULP4 | MSX2   | TCF7  |
| HAND1 | SOX11 | ID3   | SALL1 |      |       |        |       |
