# Supplementary material for: scPADGRN: A preconditioned ADMM approach for reconstructing dynamic gene regulatory network using single-cell RNA sequencing data
Source: PubMed Central journal article supplement (PMC7410337; doi:10.1371/journal.pcbi.1007471), 2020-07-27
Supplement: pcbi.1007471.s017.pdf [file pcbi.1007471.s017.pdf]

Table S5: Number of links and confirmed links in the estimated differential networks.

| Dataset   | Number of links | Number of confirmed links |
|-----------|-----------------|---------------------------|
| Dataset 1 | 283             | 28                        |
| Dataset 2 | 209             | 24                        |
| Dataset 3 | 318             | 9                         |
